# Supplementary material
Source: PubMed Central journal article supplement (PMC6865588)
Supplement: HBM-40-2252-s002.pdf [file HBM-40-2252-s002.pdf]

|           | Age          |                     | Age <sup>2</sup> |                     | Sex          |                     | Hemisphere |         | Resolution    |                     | Age*Sex       |                     | Age*Hemisphere |         | Age*Resolution |         | R <sup>2</sup> |  |
|-----------|--------------|---------------------|------------------|---------------------|--------------|---------------------|------------|---------|---------------|---------------------|---------------|---------------------|----------------|---------|----------------|---------|----------------|--|
| <b>MT</b> |              |                     |                  |                     |              |                     |            |         |               |                     |               |                     |                |         |                |         |                |  |
| TR        | <b>1.418</b> | <b>(&lt; 0.001)</b> | <b>-1.720</b>    | <b>(&lt; 0.001)</b> | -0.003       | (0.969)             | 0.183      | (0.005) | 0.065         | (0.249)             | -0.104        | (0.150)             | -0.146         | (0.035) | 0.069          | (0.213) | 0.276          |  |
| CST       | <b>0.922</b> | <b>(&lt; 0.001)</b> | <b>-1.081</b>    | <b>(&lt; 0.001)</b> | 0.065        | (0.372)             | -0.009     | (0.905) | <b>0.287</b>  | <b>(&lt; 0.001)</b> | -0.021        | (0.790)             | -0.103         | (0.176) | -0.120         | (0.049) | 0.123          |  |
| CingC     | <b>1.512</b> | <b>(&lt; 0.001)</b> | <b>-1.888</b>    | <b>(&lt; 0.001)</b> | 0.142        | (0.028)             | 0.048      | (0.456) | -0.032        | (0.561)             | -0.223        | (0.002)             | -0.035         | (0.609) | 0.015          | (0.785) | 0.310          |  |
| CingH     | <b>1.959</b> | <b>(&lt; 0.001)</b> | <b>-2.040</b>    | <b>(&lt; 0.001)</b> | 0.125        | (0.117)             | -0.143     | (0.072) | -0.035        | (0.598)             | -0.154        | (0.083)             | 0.032          | (0.701) | 0.036          | (0.579) | 0.161          |  |
| IFOF      | <b>1.278</b> | <b>(&lt; 0.001)</b> | <b>-1.675</b>    | <b>(&lt; 0.001)</b> | 0.093        | (0.249)             | 0.099      | (0.222) | -0.044        | (0.527)             | -0.167        | (0.056)             | -0.076         | (0.370) | 0.044          | (0.514) | 0.299          |  |
| ILF       | <b>1.656</b> | <b>(&lt; 0.001)</b> | <b>-2.059</b>    | <b>(&lt; 0.001)</b> | 0.093        | (0.160)             | -0.038     | (0.564) | -0.050        | (0.376)             | -0.085        | (0.243)             | 0.032          | (0.643) | 0.039          | (0.482) | 0.285          |  |
| SLF       | <b>0.965</b> | <b>(&lt; 0.001)</b> | <b>-1.326</b>    | <b>(&lt; 0.001)</b> | 0.189        | (0.004)             | -0.063     | (0.338) | 0.050         | (0.374)             | <b>-0.247</b> | <b>(&lt; 0.001)</b> | -0.084         | (0.223) | -0.062         | (0.256) | 0.285          |  |
| UNC       | <b>2.005</b> | <b>(&lt; 0.001)</b> | <b>-2.152</b>    | <b>(&lt; 0.001)</b> | -0.011       | (0.889)             | 0.237      | (0.002) | -0.023        | (0.734)             | -0.006        | (0.945)             | -0.100         | (0.214) | -0.071         | (0.271) | 0.197          |  |
| ARC       | <b>0.904</b> | <b>(&lt; 0.001)</b> | <b>-1.297</b>    | <b>(&lt; 0.001)</b> | 0.157        | (0.019)             | 0.073      | (0.273) | -0.002        | (0.978)             | -0.211        | (0.004)             | -0.020         | (0.776) | -0.007         | (0.905) | 0.261          |  |
| CC. Major | <b>1.225</b> | <b>(&lt; 0.001)</b> | <b>-1.568</b>    | <b>(&lt; 0.001)</b> | 0.195        | (0.050)             |            |         | -0.157        | (0.068)             | -0.284        | (0.010)             |                |         | 0.051          | (0.545) | 0.256          |  |
| CC. Minor | <b>0.801</b> | <b>(&lt; 0.001)</b> | <b>-1.324</b>    | <b>(&lt; 0.001)</b> | 0.024        | (0.787)             |            |         | -0.020        | (0.791)             | -0.087        | (0.364)             |                |         | 0.108          | (0.142) | 0.359          |  |
| <b>R1</b> |              |                     |                  |                     |              |                     |            |         |               |                     |               |                     |                |         |                |         |                |  |
| TR        | <b>2.063</b> | <b>(&lt; 0.001)</b> | <b>-2.116</b>    | <b>(&lt; 0.001)</b> | 0.100        | (0.140)             | 0.072      | (0.288) | <b>-0.210</b> | <b>(&lt; 0.001)</b> | <b>-0.269</b> | <b>(&lt; 0.001)</b> | -0.087         | (0.218) | 0.019          | (0.732) | 0.238          |  |
| CST       | <b>1.260</b> | <b>(&lt; 0.001)</b> | <b>-1.245</b>    | <b>(&lt; 0.001)</b> | 0.168        | (0.023)             | -0.009     | (0.899) | -0.142        | (0.026)             | -0.208        | (0.010)             | -0.081         | (0.297) | -0.044         | (0.479) | 0.097          |  |
| CingC     | <b>1.742</b> | <b>(&lt; 0.001)</b> | <b>-1.963</b>    | <b>(&lt; 0.001)</b> | 0.151        | (0.024)             | 0.064      | (0.330) | <b>-0.291</b> | <b>(&lt; 0.001)</b> | <b>-0.274</b> | <b>(&lt; 0.001)</b> | -0.010         | (0.891) | 0.057          | (0.308) | 0.270          |  |
| CingH     | <b>1.707</b> | <b>(&lt; 0.001)</b> | <b>-1.628</b>    | <b>(&lt; 0.001)</b> | 0.024        | (0.762)             | -0.098     | (0.212) | <b>-0.245</b> | <b>(&lt; 0.001)</b> | -0.086        | (0.325)             | 0.050          | (0.546) | 0.021          | (0.745) | 0.175          |  |
| IFOF      | <b>1.657</b> | <b>(&lt; 0.001)</b> | <b>-1.810</b>    | <b>(&lt; 0.001)</b> | 0.189        | (0.025)             | 0.136      | (0.107) | -0.223        | (0.002)             | <b>-0.316</b> | <b>(&lt; 0.001)</b> | -0.112         | (0.201) | -0.023         | (0.745) | 0.235          |  |
| ILF       | <b>1.796</b> | <b>(&lt; 0.001)</b> | <b>-1.970</b>    | <b>(&lt; 0.001)</b> | 0.195        | (0.005)             | -0.096     | (0.159) | <b>-0.233</b> | <b>(&lt; 0.001)</b> | -0.229        | (0.003)             | -0.018         | (0.800) | 0.026          | (0.644) | 0.230          |  |
| SLF       | <b>1.135</b> | <b>(&lt; 0.001)</b> | <b>-1.381</b>    | <b>(&lt; 0.001)</b> | <b>0.276</b> | <b>(&lt; 0.001)</b> | -0.089     | (0.190) | -0.166        | (0.005)             | <b>-0.359</b> | <b>(&lt; 0.001)</b> | -0.063         | (0.375) | 0.010          | (0.858) | 0.229          |  |
| UNC       | <b>2.018</b> | <b>(&lt; 0.001)</b> | <b>-1.970</b>    | <b>(&lt; 0.001)</b> | 0.078        | (0.312)             | 0.198      | (0.010) | -0.170        | (0.011)             | -0.119        | (0.157)             | -0.142         | (0.076) | -0.087         | (0.178) | 0.202          |  |
| ARC       | <b>1.199</b> | <b>(&lt; 0.001)</b> | <b>-1.459</b>    | <b>(&lt; 0.001)</b> | <b>0.257</b> | <b>(&lt; 0.001)</b> | -0.027     | (0.698) | -0.156        | (0.009)             | <b>-0.324</b> | <b>(&lt; 0.001)</b> | 0.039          | (0.598) | 0.012          | (0.837) | 0.191          |  |
| CC. Major | <b>1.116</b> | <b>(&lt; 0.001)</b> | <b>-1.404</b>    | <b>(&lt; 0.001)</b> | 0.222        | (0.030)             |            |         | -0.271        | (0.002)             | -0.280        | (0.014)             |                |         | 0.077          | (0.371) | 0.210          |  |
| CC. Minor | <b>1.133</b> | <b>(&lt; 0.001)</b> | <b>-1.432</b>    | <b>(&lt; 0.001)</b> | 0.041        | (0.675)             |            |         | -0.251        | (0.003)             | -0.184        | (0.083)             |                |         | 0.058          | (0.474) | 0.216          |  |

Supplementary Table 1. Regression models of age, sex, hemisphere and resolution on tract-averaged white matter MT and R1. Standardised  $\beta$ s ( $p$  values) and adjusted  $R^2$  reported. Associations significant at  $p < 0.001$  (uncorrected) highlighted in bold. Male, high resolution and left hemisphere coded as 0. CingC: cingulum-cingulate; CingH: cingulum-hippocampus; IFOF: inferior fronto-occipital fasciculus; ILF: inferior longitudinal fasciculus; SLF: superior longitudinal fasciculus; UNC: uncinata fasciculus; ARC: arcuate fasciculus; TR: thalamic radiations; CST: corticospinal tract; CC. Major: corpus callosum forceps-major; CC. Minor: corpus callosum forceps-minor.

|                | Age                     | Age <sup>2</sup>        | Sex            | Hemisphere             | Resolution             | Age*Sex        | Age*Hemisphere | Age*Resolution          | R <sup>2</sup> |
|----------------|-------------------------|-------------------------|----------------|------------------------|------------------------|----------------|----------------|-------------------------|----------------|
| <u>R2*</u>     |                         |                         |                |                        |                        |                |                |                         |                |
| TR             | <b>1.376</b> (< 0.001)  | <b>-1.489</b> (< 0.001) | -0.051 (0.487) | 0.027 (0.710)          | -0.025 (0.698)         | -0.029 (0.718) | 0.000 (0.996)  | 0.088 (0.153)           | 0.098          |
| CST            | <b>1.048</b> (< 0.001)  | <b>-0.867</b> (< 0.001) | 0.098 (0.200)  | 0.066 (0.386)          | 0.041 (0.533)          | -0.171 (0.039) | -0.029 (0.713) | 0.005 (0.937)           | 0.044          |
| CingC          | <b>1.441</b> (< 0.001)  | <b>-1.552</b> (< 0.001) | 0.072 (0.323)  | 0.066 (0.360)          | -0.175 (0.005)         | -0.175 (0.027) | 0.016 (0.837)  | 0.130 (0.033)           | 0.126          |
| CingH          | <b>1.001</b> (< 0.001)  | <b>-0.850</b> (< 0.001) | -0.037 (0.662) | -0.020 (0.811)         | -0.225 (0.001)         | 0.029 (0.753)  | 0.012 (0.893)  | <b>0.240</b> (< 0.001)  | 0.083          |
| IFOF           | <b>1.160</b> (< 0.001)  | <b>-1.313</b> (< 0.001) | -0.086 (0.352) | -0.063 (0.497)         | -0.071 (0.371)         | -0.001 (0.990) | 0.046 (0.637)  | 0.025 (0.744)           | 0.080          |
| ILF            | <b>1.162</b> (< 0.001)  | <b>-1.199</b> (< 0.001) | 0.019 (0.799)  | 0.026 (0.734)          | -0.205 (0.002)         | -0.076 (0.362) | 0.005 (0.954)  | 0.195 (0.002)           | 0.068          |
| SLF            | <b>0.876</b> (< 0.001)  | <b>-1.011</b> (< 0.001) | 0.154 (0.040)  | 0.003 (0.971)          | -0.018 (0.775)         | -0.170 (0.038) | -0.057 (0.467) | -0.008 (0.902)          | 0.070          |
| UNC            | <b>1.252</b> (< 0.001)  | <b>-1.128</b> (< 0.001) | 0.074 (0.377)  | 0.173 (0.038)          | -0.038 (0.598)         | -0.108 (0.240) | -0.101 (0.246) | 0.021 (0.767)           | 0.056          |
| ARC            | <b>0.950</b> (< 0.001)  | <b>-1.057</b> (< 0.001) | 0.075 (0.299)  | <b>0.377</b> (< 0.001) | -0.009 (0.881)         | -0.070 (0.373) | -0.111 (0.142) | 0.001 (0.986)           | 0.133          |
| CC. Major      | <b>0.780</b> (< 0.001)  | <b>-0.972</b> (< 0.001) | 0.007 (0.953)  |                        | -0.102 (0.296)         | 0.017 (0.890)  |                | 0.073 (0.440)           | 0.052          |
| CC. Minor      | 0.573 (0.005)           | <b>-0.811</b> (< 0.001) | -0.071 (0.506) |                        | -0.097 (0.287)         | 0.027 (0.815)  |                | 0.123 (0.166)           | 0.068          |
| <u>g-ratio</u> |                         |                         |                |                        |                        |                |                |                         |                |
| TR             | -0.190 (0.174)          | <b>0.505</b> (< 0.001)  | 0.062 (0.387)  | -0.175 (0.015)         | <b>0.474</b> (< 0.001) | 0.004 (0.963)  | 0.186 (0.013)  | <b>-0.453</b> (< 0.001) | 0.146          |
| CST            | -0.068 (0.643)          | 0.314 (0.027)           | -0.018 (0.812) | -0.019 (0.799)         | 0.156 (0.016)          | -0.068 (0.412) | 0.091 (0.248)  | -0.195 (0.002)          | 0.066          |
| CingC          | -0.397 (0.004)          | <b>0.735</b> (< 0.001)  | -0.185 (0.009) | 0.051 (0.472)          | <b>0.468</b> (< 0.001) | 0.205 (0.008)  | 0.036 (0.624)  | <b>-0.332</b> (< 0.001) | 0.178          |
| CingH          | <b>-0.643</b> (< 0.001) | <b>0.769</b> (< 0.001)  | -0.142 (0.081) | 0.060 (0.461)          | <b>0.615</b> (< 0.001) | 0.095 (0.293)  | 0.055 (0.515)  | <b>-0.426</b> (< 0.001) | 0.127          |
| IFOF           | <b>-0.589</b> (< 0.001) | <b>0.770</b> (< 0.001)  | -0.083 (0.357) | 0.017 (0.848)          | <b>0.680</b> (< 0.001) | 0.196 (0.044)  | 0.048 (0.607)  | <b>-0.571</b> (< 0.001) | 0.132          |
| ILF            | <b>-0.522</b> (< 0.001) | <b>0.852</b> (< 0.001)  | -0.045 (0.536) | 0.098 (0.176)          | <b>0.534</b> (< 0.001) | 0.033 (0.680)  | -0.082 (0.282) | <b>-0.377</b> (< 0.001) | 0.134          |
| SLF            | -0.220 (0.116)          | <b>0.503</b> (< 0.001)  | -0.089 (0.219) | 0.042 (0.558)          | 0.160 (0.010)          | 0.192 (0.015)  | 0.064 (0.394)  | -0.108 (0.073)          | 0.143          |
| UNC            | -0.386 (0.011)          | <b>0.602</b> (< 0.001)  | -0.062 (0.449) | -0.023 (0.773)         | <b>0.577</b> (< 0.001) | -0.020 (0.820) | -0.005 (0.953) | <b>-0.405</b> (< 0.001) | 0.090          |
| ARC            | -0.235 (0.097)          | <b>0.522</b> (< 0.001)  | -0.071 (0.332) | 0.068 (0.349)          | <b>0.239</b> (< 0.001) | 0.190 (0.016)  | -0.008 (0.919) | -0.175 (0.004)          | 0.128          |
| CC. Major      | -0.320 (0.133)          | 0.490 (0.019)           | -0.161 (0.142) |                        | 0.306 (0.001)          | 0.297 (0.014)  |                | -0.160 (0.083)          | 0.096          |
| CC. Minor      | -0.489 (0.013)          | <b>0.760</b> (< 0.001)  | -0.039 (0.704) |                        | <b>0.406</b> (< 0.001) | 0.153 (0.173)  |                | <b>-0.394</b> (< 0.001) | 0.128          |

Supplementary Table 2. Regression models of age, sex, hemisphere and resolution on tract-averaged white matter R2\* and g-ratio. Standardised  $\beta$ s ( $p$  values) and adjusted  $R^2$  reported. Associations significant at  $p < 0.001$  (uncorrected) highlighted in bold. Male, high resolution and left hemisphere coded as 0. CingC: cingulum-cingulate; CingH: cingulum-hippocampus; IFOF: inferior fronto-occipital fasciculus; ILF: inferior longitudinal fasciculus; SLF: superior longitudinal fasciculus; UNC: uncinate fasciculus; ARC: arcuate fasciculus; TR: thalamic radiations; CST: corticospinal tract; CC. Major: corpus callosum forceps-major; CC. Minor: corpus callosum forceps-minor.

|           | Age                        | Age <sup>2</sup>           | Sex            | Hemisphere                 | Resolution                 | Age*Sex        | Age*Hemisphere            | Age*Resolution            | R <sup>2</sup> |
|-----------|----------------------------|----------------------------|----------------|----------------------------|----------------------------|----------------|---------------------------|---------------------------|----------------|
| <b>FA</b> |                            |                            |                |                            |                            |                |                           |                           |                |
| TR        | <b>-0.647 (&lt; 0.001)</b> | <b>0.811 (&lt; 0.001)</b>  | -0.048 (0.512) | -0.121 (0.098)             | -0.094 (0.138)             | -0.169 (0.036) | <b>0.256 (&lt; 0.001)</b> | 0.109 (0.076)             | 0.099          |
| CST       | <b>-0.988 (&lt; 0.001)</b> | <b>0.792 (&lt; 0.001)</b>  | -0.058 (0.444) | 0.100 (0.179)              | <b>-0.319 (&lt; 0.001)</b> | -0.032 (0.697) | 0.010 (0.896)             | <b>0.211 (&lt; 0.001)</b> | 0.073          |
| CingC     | 0.242 (0.086)              | -0.321 (0.018)             | -0.148 (0.042) | <b>0.450 (&lt; 0.001)</b>  | -0.083 (0.183)             | 0.042 (0.594)  | -0.127 (0.093)            | 0.019 (0.749)             | 0.140          |
| CingH     | 0.076 (0.655)              | -0.299 (0.067)             | -0.187 (0.029) | -0.170 (0.046)             | -0.214 (0.003)             | 0.107 (0.260)  | 0.141 (0.113)             | 0.122 (0.079)             | 0.038          |
| IFOF      | 0.192 (0.259)              | -0.290 (0.071)             | -0.089 (0.341) | <b>-0.448 (&lt; 0.001)</b> | 0.070 (0.385)              | 0.049 (0.631)  | 0.259 (0.008)             | -0.070 (0.369)            | 0.049          |
| ILF       | <b>-0.426 (&lt; 0.001)</b> |                            | 0.071 (0.318)  | 0.137 (0.053)              | <b>-0.387 (&lt; 0.001)</b> | -0.056 (0.468) | -0.004 (0.957)            | <b>0.316 (&lt; 0.001)</b> | 0.178          |
| SLF       | -0.414 (0.002)             | 0.296 (0.024)              | 0.024 (0.731)  | <b>-0.342 (&lt; 0.001)</b> | <b>-0.246 (&lt; 0.001)</b> | -0.073 (0.341) | -0.065 (0.378)            | 0.140 (0.017)             | 0.188          |
| UNC       | <b>0.520 (&lt; 0.001)</b>  | <b>-0.554 (&lt; 0.001)</b> | -0.132 (0.105) | <b>0.410 (&lt; 0.001)</b>  | -0.216 (0.002)             | -0.045 (0.614) | -0.277 (0.001)            | 0.078 (0.256)             | 0.102          |
| ARC       | <b>-0.569 (&lt; 0.001)</b> | <b>0.462 (&lt; 0.001)</b>  | -0.004 (0.953) | <b>0.524 (&lt; 0.001)</b>  | <b>-0.338 (&lt; 0.001)</b> | 0.016 (0.841)  | -0.188 (0.012)            | <b>0.263 (&lt; 0.001)</b> | 0.157          |
| CC. Major | 0.334 (0.128)              | -0.547 (0.011)             | -0.017 (0.883) |                            | -0.211 (0.032)             | 0.068 (0.585)  |                           | 0.212 (0.026)             | 0.036          |
| CC. Minor | <b>-1.107 (&lt; 0.001)</b> | 0.464 (0.004)              | -0.091 (0.291) |                            | -0.127 (0.086)             | 0.050 (0.596)  |                           | 0.089 (0.218)             | 0.387          |
| <b>MD</b> |                            |                            |                |                            |                            |                |                           |                           |                |
| TR        | <b>-1.902 (&lt; 0.001)</b> | <b>2.040 (&lt; 0.001)</b>  | -0.135 (0.048) | -0.009 (0.898)             | <b>-0.614 (&lt; 0.001)</b> | 0.157 (0.036)  | -0.067 (0.350)            | <b>0.445 (&lt; 0.001)</b> | 0.224          |
| CST       | <b>-1.740 (&lt; 0.001)</b> | <b>1.794 (&lt; 0.001)</b>  | -0.090 (0.204) | -0.102 (0.147)             | <b>-0.714 (&lt; 0.001)</b> | 0.070 (0.366)  | 0.050 (0.500)             | <b>0.527 (&lt; 0.001)</b> | 0.183          |
| CingC     | <b>-1.415 (&lt; 0.001)</b> | <b>1.595 (&lt; 0.001)</b>  | 0.013 (0.858)  | 0.009 (0.897)              | <b>-0.428 (&lt; 0.001)</b> | 0.058 (0.454)  | -0.063 (0.399)            | <b>0.284 (&lt; 0.001)</b> | 0.158          |
| CingH     | <b>-0.760 (&lt; 0.001)</b> | <b>0.729 (&lt; 0.001)</b>  | -0.044 (0.599) | 0.012 (0.887)              | <b>-0.436 (&lt; 0.001)</b> | 0.025 (0.791)  | -0.139 (0.112)            | <b>0.242 (&lt; 0.001)</b> | 0.067          |
| IFOF      | <b>-0.937 (&lt; 0.001)</b> | <b>1.295 (&lt; 0.001)</b>  | -0.001 (0.994) | <b>-0.305 (&lt; 0.001)</b> | <b>-0.396 (&lt; 0.001)</b> | -0.063 (0.482) | 0.137 (0.111)             | <b>0.338 (&lt; 0.001)</b> | 0.269          |
| ILF       | <b>-1.502 (&lt; 0.001)</b> | <b>1.687 (&lt; 0.001)</b>  | -0.062 (0.392) | -0.153 (0.032)             | <b>-0.334 (&lt; 0.001)</b> | 0.051 (0.516)  | 0.119 (0.113)             | <b>0.238 (&lt; 0.001)</b> | 0.166          |
| SLF       | <b>-1.143 (&lt; 0.001)</b> | <b>1.435 (&lt; 0.001)</b>  | -0.152 (0.033) | 0.003 (0.963)              | -0.184 (0.003)             | 0.071 (0.359)  | -0.006 (0.938)            | 0.158 (0.008)             | 0.162          |
| UNC       | <b>-1.870 (&lt; 0.001)</b> | <b>1.914 (&lt; 0.001)</b>  | 0.053 (0.491)  | -0.210 (0.007)             | <b>-0.424 (&lt; 0.001)</b> | 0.076 (0.368)  | 0.026 (0.749)             | <b>0.364 (&lt; 0.001)</b> | 0.188          |
| ARC       | <b>-0.925 (&lt; 0.001)</b> | <b>1.208 (&lt; 0.001)</b>  | -0.147 (0.040) | -0.129 (0.068)             | -0.173 (0.005)             | 0.063 (0.419)  | -0.009 (0.903)            | 0.145 (0.015)             | 0.157          |
| CC. Major | <b>-0.828 (&lt; 0.001)</b> | <b>0.868 (&lt; 0.001)</b>  | 0.204 (0.073)  |                            | <b>-0.383 (&lt; 0.001)</b> | -0.220 (0.079) |                           | 0.299 (0.002)             | 0.030          |
| CC. Minor | <b>-0.983 (&lt; 0.001)</b> | <b>1.412 (&lt; 0.001)</b>  | 0.076 (0.423)  |                            | <b>-0.407 (&lt; 0.001)</b> | -0.155 (0.134) |                           | <b>0.297 (&lt; 0.001)</b> | 0.254          |

Supplementary Table 3. Regression models of age, sex, hemisphere and resolution on tract-averaged white matter FA and MD. Standardised  $\beta$ s ( $p$  values) and adjusted  $R^2$  reported. Associations significant at  $p < 0.001$  (uncorrected) highlighted in bold. Male, high resolution and left hemisphere coded as 0. CingC: cingulum-cingulate; CingH: cingulum-hippocampus; IFOF: inferior fronto-occipital fasciculus; ILF: inferior longitudinal fasciculus; SLF: superior longitudinal fasciculus; UNC: uncinate fasciculus; ARC: arcuate fasciculus; TR: thalamic radiations; CST: corticospinal tract; CC. Major: corpus callosum forceps-major; CC. Minor: corpus callosum forceps-minor.

|             | Age                    | Age <sup>2</sup>        | Sex            | Hemisphere              | Resolution             | Age*Sex        | Age*Hemisphere | Age*Resolution          | R <sup>2</sup> |
|-------------|------------------------|-------------------------|----------------|-------------------------|------------------------|----------------|----------------|-------------------------|----------------|
| <u>ODI</u>  |                        |                         |                |                         |                        |                |                |                         |                |
| TR          | <b>1.460</b> (< 0.001) | <b>-1.576</b> (< 0.001) | 0.134 (0.055)  | 0.072 (0.299)           | <b>0.604</b> (< 0.001) | 0.043 (0.576)  | -0.183 (0.012) | <b>-0.462</b> (< 0.001) | 0.190          |
| CST         | <b>1.475</b> (< 0.001) | <b>-1.276</b> (< 0.001) | 0.086 (0.239)  | 0.035 (0.624)           | <b>0.687</b> (< 0.001) | 0.001 (0.993)  | -0.041 (0.588) | <b>-0.459</b> (< 0.001) | 0.126          |
| CingC       | <b>0.518</b> (< 0.001) | -0.419 (0.003)          | 0.125 (0.095)  | <b>-0.305</b> (< 0.001) | <b>0.390</b> (< 0.001) | -0.069 (0.401) | 0.124 (0.115)  | <b>-0.236</b> (< 0.001) | 0.078          |
| CingH       | 0.484 (0.003)          | -0.229 (0.151)          | 0.144 (0.084)  | 0.101 (0.224)           | <b>0.621</b> (< 0.001) | -0.153 (0.099) | -0.065 (0.455) | <b>-0.397</b> (< 0.001) | 0.087          |
| IFOF        | -0.026 (0.626)         |                         | 0.097 (0.292)  | <b>0.478</b> (< 0.001)  | 0.120 (0.115)          | -0.049 (0.620) | -0.252 (0.009) | -0.080 (0.275)          | 0.087          |
| ILF         | <b>1.248</b> (< 0.001) | <b>-0.908</b> (< 0.001) | 0.029 (0.681)  | -0.117 (0.098)          | <b>0.783</b> (< 0.001) | -0.044 (0.576) | -0.064 (0.390) | <b>-0.545</b> (< 0.001) | 0.174          |
| SLF         | <b>0.857</b> (< 0.001) | <b>-0.833</b> (< 0.001) | 0.028 (0.674)  | <b>0.390</b> (< 0.001)  | <b>0.390</b> (< 0.001) | 0.071 (0.326)  | 0.084 (0.228)  | <b>-0.243</b> (< 0.001) | 0.266          |
| UNC         | <b>0.598</b> (< 0.001) | <b>-0.522</b> (< 0.001) | 0.044 (0.590)  | -0.240 (0.003)          | <b>0.729</b> (< 0.001) | 0.028 (0.750)  | 0.214 (0.012)  | <b>-0.500</b> (< 0.001) | 0.102          |
| ARC         | <b>0.754</b> (< 0.001) | <b>-0.724</b> (< 0.001) | 0.065 (0.354)  | <b>-0.568</b> (< 0.001) | <b>0.497</b> (< 0.001) | -0.023 (0.762) | 0.206 (0.005)  | <b>-0.360</b> (< 0.001) | 0.197          |
| CC. Major   | -0.322 (0.143)         | 0.536 (0.013)           | 0.036 (0.751)  |                         | 0.225 (0.022)          | -0.070 (0.576) |                | -0.212 (0.027)          | 0.035          |
| CC. Minor   | <b>1.743</b> (< 0.001) | <b>-1.222</b> (< 0.001) | 0.022 (0.815)  |                         | <b>0.563</b> (< 0.001) | 0.054 (0.590)  |                | <b>-0.385</b> (< 0.001) | 0.293          |
| <u>ICVF</u> |                        |                         |                |                         |                        |                |                |                         |                |
| TR          | <b>1.458</b> (< 0.001) | <b>-1.336</b> (< 0.001) | 0.071 (0.319)  | 0.006 (0.931)           | <b>0.862</b> (< 0.001) | -0.114 (0.142) | 0.029 (0.696)  | <b>-0.607</b> (< 0.001) | 0.156          |
| CST         | <b>1.230</b> (< 0.001) | <b>-0.932</b> (< 0.001) | 0.058 (0.422)  | -0.135 (0.060)          | <b>0.768</b> (< 0.001) | -0.171 (0.029) | 0.032 (0.668)  | <b>-0.529</b> (< 0.001) | 0.147          |
| CingC       | <b>1.339</b> (< 0.001) | <b>-1.264</b> (< 0.001) | -0.056 (0.437) | 0.137 (0.057)           | <b>0.722</b> (< 0.001) | -0.012 (0.875) | -0.016 (0.836) | <b>-0.511</b> (< 0.001) | 0.133          |
| CingH       | <b>1.240</b> (< 0.001) | <b>-1.101</b> (< 0.001) | -0.025 (0.749) | -0.048 (0.539)          | <b>0.895</b> (< 0.001) | -0.091 (0.298) | 0.035 (0.670)  | <b>-0.603</b> (< 0.001) | 0.179          |
| IFOF        | <b>0.652</b> (< 0.001) | <b>-0.779</b> (< 0.001) | 0.014 (0.869)  | 0.101 (0.246)           | <b>0.879</b> (< 0.001) | 0.016 (0.868)  | -0.026 (0.773) | <b>-0.686</b> (< 0.001) | 0.186          |
| ILF         | <b>1.222</b> (< 0.001) | <b>-1.229</b> (< 0.001) | 0.040 (0.581)  | 0.009 (0.901)           | <b>0.737</b> (< 0.001) | -0.055 (0.488) | -0.024 (0.750) | <b>-0.501</b> (< 0.001) | 0.143          |
| SLF         | <b>1.200</b> (< 0.001) | <b>-1.171</b> (< 0.001) | 0.117 (0.119)  | -0.019 (0.801)          | <b>0.486</b> (< 0.001) | -0.050 (0.538) | -0.038 (0.628) | <b>-0.363</b> (< 0.001) | 0.071          |
| UNC         | <b>1.831</b> (< 0.001) | <b>-1.666</b> (< 0.001) | -0.113 (0.141) | 0.252 (0.001)           | <b>0.938</b> (< 0.001) | 0.002 (0.985)  | -0.155 (0.053) | <b>-0.745</b> (< 0.001) | 0.202          |
| ARC         | <b>0.993</b> (< 0.001) | <b>-1.003</b> (< 0.001) | 0.089 (0.235)  | 0.121 (0.104)           | <b>0.512</b> (< 0.001) | 0.005 (0.955)  | -0.048 (0.535) | <b>-0.370</b> (< 0.001) | 0.079          |
| CC. Major   | 0.684 (0.002)          | <b>-0.769</b> (< 0.001) | 0.010 (0.926)  |                         | 0.200 (0.043)          | 0.078 (0.531)  |                | -0.087 (0.363)          | 0.032          |
| CC. Minor   | 0.349 (0.067)          | -0.598 (0.001)          | 0.021 (0.832)  |                         | <b>0.623</b> (< 0.001) | 0.017 (0.874)  |                | <b>-0.429</b> (< 0.001) | 0.190          |

Supplementary Table 4. Regression models of age, sex, hemisphere and resolution on tract-averaged white matter ODI and ICVF. Standardised  $\beta$ s ( $p$  values) and adjusted  $R^2$  reported. Associations significant at  $p < 0.001$  (uncorrected) highlighted in bold. Male, high resolution and left hemisphere coded as 0. CingC: cingulum-cingulate; CingH: cingulum-hippocampus; IFOF: inferior fronto-occipital fasciculus; ILF: inferior longitudinal fasciculus; SLF: superior longitudinal fasciculus; UNC: uncinate fasciculus; ARC: arcuate fasciculus; TR: thalamic radiations; CST: corticospinal tract; CC. Major: corpus callosum forceps-major; CC. Minor: corpus callosum forceps-minor.

|                     | Age                    | Age <sup>2</sup>        | Sex            | Hemisphere             | Resolution                  | Age*Sex        | Age*Hemisphere | Age*Resolution | R <sup>2</sup> |
|---------------------|------------------------|-------------------------|----------------|------------------------|-----------------------------|----------------|----------------|----------------|----------------|
| <u>Tract volume</u> |                        |                         |                |                        |                             |                |                |                |                |
| TR                  | <b>1.681</b> (< 0.001) | <b>-1.891</b> (< 0.001) | -0.097 (0.157) | -0.040 (0.559)         | 0.349 ( <b>&lt; 0.001</b> ) | -0.016 (0.831) | 0.004 (0.959)  | -0.134 (0.018) | 0.232          |
| CST                 | 0.286 (0.049)          | <b>-0.549</b> (< 0.001) | -0.021 (0.782) | -0.026 (0.723)         | 0.199 (0.002)               | 0.027 (0.737)  | 0.061 (0.431)  | -0.078 (0.211) | 0.091          |
| CingC               | <b>1.116</b> (< 0.001) | <b>-1.218</b> (< 0.001) | -0.131 (0.077) | 0.098 (0.182)          | -0.061 (0.335)              | -0.008 (0.923) | -0.006 (0.943) | 0.120 (0.052)  | 0.094          |
| CingH               | <b>0.956</b> (< 0.001) | <b>-1.077</b> (< 0.001) | 0.020 (0.818)  | -0.045 (0.593)         | 0.047 (0.514)               | 0.092 (0.331)  | 0.033 (0.708)  | -0.021 (0.758) | 0.041          |
| IFOF                | <b>1.080</b> (< 0.001) | <b>-0.970</b> (< 0.001) | 0.259 (0.005)  | 0.216 (0.021)          | <b>0.281</b> (< 0.001)      | -0.305 (0.003) | -0.093 (0.337) | -0.150 (0.053) | 0.066          |
| ILF                 | <b>0.954</b> (< 0.001) | <b>-1.112</b> (< 0.001) | 0.170 (0.025)  | -0.098 (0.194)         | 0.071 (0.276)               | -0.072 (0.384) | 0.060 (0.447)  | -0.021 (0.743) | 0.071          |
| SLF                 | 0.257 (0.078)          | <b>-0.535</b> (< 0.001) | -0.151 (0.045) | 0.045 (0.549)          | <b>-0.292</b> (< 0.001)     | 0.138 (0.092)  | 0.061 (0.435)  | 0.196 (0.002)  | 0.065          |
| UNC                 | <b>0.966</b> (< 0.001) | <b>-0.916</b> (< 0.001) | 0.124 (0.141)  | -0.145 (0.083)         | 0.252 (0.001)               | -0.051 (0.578) | 0.092 (0.294)  | -0.140 (0.047) | 0.043          |
| ARC                 | <b>1.294</b> (< 0.001) | <b>-1.317</b> (< 0.001) | -0.069 (0.345) | <b>0.295</b> (< 0.001) | 0.068 (0.283)               | 0.043 (0.593)  | -0.074 (0.335) | -0.021 (0.729) | 0.108          |
| CC. Major           | 0.262 (0.224)          | -0.463 (0.028)          | 0.126 (0.254)  |                        | 0.248 (0.010)               | 0.031 (0.800)  |                | -0.151 (0.106) | 0.077          |
| CC. Minor           | <b>0.676</b> (< 0.001) | <b>-1.264</b> (< 0.001) | -0.070 (0.449) |                        | -0.188 (0.017)              | 0.130 (0.193)  |                | 0.178 (0.020)  | 0.307          |

Supplementary Table 5. Regression models of age, sex, hemisphere and resolution on AFQ derived mm<sup>3</sup> tract volume estimates. Standardised  $\beta$ s ( $p$  values) and adjusted  $R^2$  reported. Associations significant at  $p < 0.001$  (uncorrected) highlighted in bold. Male, high resolution and left hemisphere coded as 0. CingC: cingulum-cingulate; CingH: cingulum-hippocampus; IFOF: inferior fronto-occipital fasciculus; ILF: inferior longitudinal fasciculus; SLF: superior longitudinal fasciculus; UNC: uncinate fasciculus; ARC: arcuate fasciculus; TR: thalamic radiations; CST: corticospinal tract; CC. Major: corpus callosum forceps-major; CC. Minor: corpus callosum forceps-minor.
